# Supplementary material for: The efficacy of a coordinated pharmacological blockade in glioblastoma stem cells with nine repurposed drugs using the CUSP9 strategy
Source: J Cancer Res Clin Oncol. 2019 Apr 26;145(6):1495–507. doi: 10.1007/s00432-019-02920-4 (PMC6527541; doi:10.1007/s00432-019-02920-4)
Supplement: Supplementary file 1 — Patient and GSC culture characteristics (XLSX 40 kb) [file 432_2019_2920_MOESM1_ESM.xlsx]

## Sheet: Primary GBM
Tumor	Age	Sex	Histology	IDH status	MGMT promoter status	Lobe	Survival (days)	Morphology (in vitro)	Exponential growth to P10	Subtype	Invasive Xenograft within 15 weeks	Cell survival (%)
												Viability	Cytotoxicity	Sphere (count)	Sphere (area)
T0965	61	M	GBM	NA	NA	Right parietal	456	Spheroid	Yes	Proneural	Yes	12.3574	0	2.29358	2.81734
T1008	49	F	GBM	NA	NA	Right frontal	456	Spheroid	Yes	Proneural	Yes	49.7098	7.25939	1.66667	0.267753
T1454	71	F	GBM	Neg	Pos	Right temporal	299	Spheroid	Yes	Mesenchymal	Yes	92.2831	52.0461	29.7535	4.74066
T1456	50	M	GBM	Neg	Neg	Right parietal	282	Spheroid	Yes	Proneural	Yes	3.05618	15.5259	1.55977	0.0974909
T1459	65	M	GBM	Neg	Pos	Left temporal	170	Spheroid	Yes	Proneural	Yes	9.06984	10.1815	0.634644	0
T1502	43	M	GBM	Neg	Neg	Left parietal	262	Spheroid	Yes	Mesenchymal	Yes	91.9995	78.9664	102.368	15.9918
T1506	84	M	GBM	Neg	Pos	Left temporal	200	Spheroid	Yes	Proneural	Yes	16.6941	9.84246	0.353669	0.35847
T1547	67	F	GBM	Neg	NA	Right temporal	187	Spheroid	Yes	Proneural	Yes	124.365	79.8291	69.2308	18.3489
T1550	56	F	GBM	Neg	Neg	Right parietal	115	Spheroid	Yes	Proneural	Not grafted	60.9117	46.8522	0	0
T1561	66	M	GBM	Neg	Pos	Right temporal	367	Spheroid	Yes	NA	Not grafted	142.299	NA	2.92398	2.26337
NA = Not Available

## Sheet: Recurrent GBM
	Primary tumor							Recurrent tumor								Invasive Xenograft	Cell survival (%)
Tumor	Sex	Age	Histology	Lobe	MGMT promoter	IDH-status	Oncological treatment	Time since first surgery (months)	Histology	Resection grade	2nd line oncological therapy	Survival after reoperation (days)	Morphology	Exponential growth to P10	Subtype	within 15 weeks	Viability	Cytotoxicity	Sphere (count)	Sphere (area)
T1513	M	50	GBM	Right parietal	neg	wt	Stupp regimen	5.1	GBM recurrence	Complete	CCNU	129	Spheroid	Yes	Proneural	Yes	8.23567	13.3479	3.90608	0.528214
T1516	F	58	GBM	Left occipital	neg	wt	Stupp regimen	8.3	GBM recurrence	Subtotal	CCNU	178	Spheroid	Yes	Proneural	Yes	85.5684	46.5876	22.2517	7.71707
T1532	M	50	Anaplastic oligoastro-cytoma	Left temporal	NA	wt	1,8 Gy x 30	23.1	GBM	Complete	CCNU	156	Spheroid	Yes	NA	No	13.591	20.1797	9.87765	2.03778
T1534	M	54	Gian cell GBM	Left temporal	pos	wt	Stupp regimen	23.6	GBM recurrence	Complete	CCNU	111	Spheroid	Yes	Proneural	Yes	68.9477	46.6293	2.44012	5.36673
T1544	M	48	GBM	NA	NA	wt	Stupp regimen	11.9	GBM recurrence	Subtotal	CCNU	52	Spheroid	Yes	Proneural	Yes	15.9459	10.931	0.881694	0.468611
NA = Not Available
